# Supplementary material for: Characteristics and outcomes of hepatocellular carcinoma patients with macrovascular invasion following surgical resection: a meta-analysis of 40 studies and 8,218 patients
Source: PubMed Central journal article supplement — Hepatobiliary Surg Nutr. 2022 Dec;11(6):848–60. doi: 10.21037/hbsn-21-419 (PMC9745615; doi:10.21037/hbsn-21-419), 2022-12
Supplement: hbsn-11-06-848-supplementary.pdf [file hbsn-11-06-848-supplementary.pdf]

**Appendix 1***Search Strategy***PubMed (2846)**

((“carcinoma, hepatocellular/surgery”[MeSH Terms] OR “hepatocellular carcinoma”[tw] OR “HCC”[tiab]) AND ( resection[tiab] OR “Hepatectomy”[Majr] OR “hepatic lobectomy”[tiab] OR “surgical”[tiab]) AND (“disease-free survival”[Mesh] OR “survival”[tiab] OR recurrence[tiab] OR “neoplasm recurrence, local”[Mesh] OR “disease-free”[tiab]) AND “last 15 years”[dp]) NOT (“Animals”[Mesh] NOT (“Animals”[Mesh] AND “Humans”[Mesh])) AND (“comparative study”[PT] OR “randomized controlled trial”[PT] OR “multicenter study”[PT] OR “retrospective studies”[Mesh] OR “cohort studies”[Mesh] OR “case-control studies”[Mesh] OR “clinical study”[PT] OR “clinical trial”[PT] OR “observational study”[pt])

**Cochrane (854)**

(“hepatocellular carcinoma” OR “hcc”) AND (surgery OR surgical OR resection OR lobectomy OR hepatectomy) AND (disease-free OR recurrence OR survival)

**Embase: (2871)**

((('liver cell carcinoma' OR 'hepatocellular carcinoma' OR 'hcc') NEAR/10 (resection OR surgery OR 'hepatic lobectomy' OR 'surgical')) OR ('liver cell carcinoma'/exp/mj AND 'liver resection'/exp/mj)) AND ('disease free survival'/de OR 'disease free interval'/de OR 'cancer survival'/exp OR survival:ti,ab OR recurrence:ti,ab OR 'cancer recurrence'/exp OR 'disease-free':ti,ab) AND human\* AND (2005:py OR 2006:py OR 2007:py OR 2008:py OR 2009:py OR 2010:py OR 2011:py OR 2012:py OR 2013:py OR 2014:py OR 2015:py OR 2016:py OR 2017:py OR 2018:py OR 2019:py OR 2020:py) AND ('article'/it OR 'article in press'/it OR 'letter'/it OR 'note'/it OR 'review'/it OR 'short survey'/it) AND 'surgery'/lnk AND ('case control study'/de OR 'clinical article'/de OR 'clinical trial'/de OR 'cohort analysis'/de OR 'comparative effectiveness'/de OR 'comparative study'/de OR 'controlled clinical trial'/de OR 'controlled study'/de OR 'intermethod comparison'/de OR 'major clinical study'/de OR 'medical record review'/de OR 'multicenter study'/de OR 'multicenter study topic'/de OR 'observational study'/de OR 'phase 2 clinical trial topic'/de OR 'phase 3 clinical trial topic'/de OR 'prospective s

**Table S1** PRISMA

| Section/topic                      | #  | Checklist item                                                                                                                                                                                                                                                                                              | Reported on page #   |
|------------------------------------|----|-------------------------------------------------------------------------------------------------------------------------------------------------------------------------------------------------------------------------------------------------------------------------------------------------------------|----------------------|
| <b>TITLE</b>                       |    |                                                                                                                                                                                                                                                                                                             |                      |
| Title                              | 1  | Identify the report as a systematic review, meta-analysis, or both.                                                                                                                                                                                                                                         | 1                    |
| <b>ABSTRACT</b>                    |    |                                                                                                                                                                                                                                                                                                             |                      |
| Structured summary                 | 2  | Provide a structured summary including, as applicable: background; objectives; data sources; study eligibility criteria, participants, and interventions; study appraisal and synthesis methods; results; limitations; conclusions and implications of key findings; systematic review registration number. | 4                    |
| <b>INTRODUCTION</b>                |    |                                                                                                                                                                                                                                                                                                             |                      |
| Rationale                          | 3  | Describe the rationale for the review in the context of what is already known.                                                                                                                                                                                                                              | 5                    |
| Objectives                         | 4  | Provide an explicit statement of questions being addressed with reference to participants, interventions, comparisons, outcomes, and study design (PICOS).                                                                                                                                                  | 5                    |
| <b>METHODS</b>                     |    |                                                                                                                                                                                                                                                                                                             |                      |
| Protocol and registration          | 5  | Indicate if a review protocol exists, if and where it can be accessed (e.g., Web address), and, if available, provide registration information including registration number.                                                                                                                               | –                    |
| Eligibility criteria               | 6  | Specify study characteristics (e.g., PICOS, length of follow-up) and report characteristics (e.g., years considered, language, publication status) used as criteria for eligibility, giving rationale.                                                                                                      | 6                    |
| Information sources                | 7  | Describe all information sources (e.g., databases with dates of coverage, contact with study authors to identify additional studies) in the search and date last searched.                                                                                                                                  | 5–6                  |
| Search                             | 8  | Present full electronic search strategy for at least one database, including any limits used, such that it could be repeated.                                                                                                                                                                               | Supplemental file    |
| Study selection                    | 9  | State the process for selecting studies (i.e., screening, eligibility, included in systematic review, and, if applicable, included in the meta-analysis).                                                                                                                                                   | 5–6                  |
| Data collection process            | 10 | Describe method of data extraction from reports (e.g., piloted forms, independently, in duplicate) and any processes for obtaining and confirming data from investigators.                                                                                                                                  | 5–6                  |
| Data items                         | 11 | List and define all variables for which data were sought (e.g., PICOS, funding sources) and any assumptions and simplifications made.                                                                                                                                                                       | 6                    |
| Risk of bias in individual studies | 12 | Describe methods used for assessing risk of bias of individual studies (including specification of whether this was done at the study or outcome level), and how this information is to be used in any data synthesis.                                                                                      | 6                    |
| Summary measures                   | 13 | State the principal summary measures (e.g., risk ratio, difference in means).                                                                                                                                                                                                                               | 6                    |
| Synthesis of results               | 14 | Describe the methods of handling data and combining results of studies, if done, including measures of consistency (e.g., $I^2$ ) for each meta-analysis.                                                                                                                                                   | 7                    |
| <b>Section/topic</b>               |    |                                                                                                                                                                                                                                                                                                             |                      |
| <b>#</b>                           |    |                                                                                                                                                                                                                                                                                                             |                      |
| <b>Checklist item</b>              |    |                                                                                                                                                                                                                                                                                                             |                      |
| <b>Reported on page #</b>          |    |                                                                                                                                                                                                                                                                                                             |                      |
| Risk of bias across studies        | 15 | Specify any assessment of risk of bias that may affect the cumulative evidence (e.g., publication bias, selective reporting within studies).                                                                                                                                                                | 7                    |
| Additional analyses                | 16 | Describe methods of additional analyses (e.g., sensitivity or subgroup analyses, meta-regression), if done, indicating which were pre-specified.                                                                                                                                                            | 6–7                  |
| <b>RESULTS</b>                     |    |                                                                                                                                                                                                                                                                                                             |                      |
| Study selection                    | 17 | Give numbers of studies screened, assessed for eligibility, and included in the review, with reasons for exclusions at each stage, ideally with a flow diagram.                                                                                                                                             | Figure 1             |
| Study characteristics              | 18 | For each study, present characteristics for which data were extracted (e.g., study size, PICOS, follow-up period) and provide the citations.                                                                                                                                                                | Supplemental Table 2 |
| Risk of bias within studies        | 19 | Present data on risk of bias of each study and, if available, any outcome level assessment (see item 12).                                                                                                                                                                                                   | Supplemental Table 4 |
| Results of individual studies      | 20 | For all outcomes considered (benefits or harms), present, for each study: (a) simple summary data for each intervention group (b) effect estimates and confidence intervals, ideally with a forest plot.                                                                                                    | Table 1–4            |
| Synthesis of results               | 21 | Present results of each meta-analysis done, including confidence intervals and measures of consistency.                                                                                                                                                                                                     | Table 1–4            |
| Risk of bias across studies        | 22 | Present results of any assessment of risk of bias across studies (see Item 15).                                                                                                                                                                                                                             | Supplemental Table 4 |
| Additional analysis                | 23 | Give results of additional analyses, if done (e.g., sensitivity or subgroup analyses, meta-regression [see Item 16]).                                                                                                                                                                                       | 10–11                |
| <b>DISCUSSION</b>                  |    |                                                                                                                                                                                                                                                                                                             |                      |
| Summary of evidence                | 24 | Summarize the main findings including the strength of evidence for each main outcome; consider their relevance to key groups (e.g., healthcare providers, users, and policy makers).                                                                                                                        | 11–13                |
| Limitations                        | 25 | Discuss limitations at study and outcome level (e.g., risk of bias), and at review-level (e.g., incomplete retrieval of identified research, reporting bias).                                                                                                                                               | 14                   |
| Conclusions                        | 26 | Provide a general interpretation of the results in the context of other evidence, and implications for future research.                                                                                                                                                                                     | 14                   |
| <b>FUNDING</b>                     |    |                                                                                                                                                                                                                                                                                                             |                      |
| Funding                            | 27 | Describe sources of funding for the systematic review and other support (e.g., supply of data); role of funders for the systematic review.                                                                                                                                                                  | 2                    |

**Table S2** Study characteristics of included studies

| Author                    | Publication year | Study start year | Study end year | Country/region | Study region  | Study design  | Sample size | Follow-up duration, median/mean (months) |
|---------------------------|------------------|------------------|----------------|----------------|---------------|---------------|-------------|------------------------------------------|
| Chen XP <sup>45</sup>     | 2006             | 1990             | 2003           | China          | Asia          | Retrospective | 438         | –                                        |
| Peng BG <sup>46</sup>     | 2009             | 1996             | 2004           | China          | Asia          | Retrospective | 53          | 33.6                                     |
| Fan J <sup>47</sup>       | 2005             | 1997             | 2004           | China          | Asia          | Retrospective | 24          | –                                        |
| Shi J <sup>48</sup>       | 2010             | 2001             | 2003           | China          | Asia          | Retrospective | 406         | 6.4                                      |
| Shi J <sup>16</sup>       | 2011             | 2001             | 2004           | China          | Asia          | Retrospective | 441         | 6.4                                      |
| Liang LJ <sup>49</sup>    | 2008             | 2001             | 2005           | China          | Asia          | Retrospective | 53          | 10.2                                     |
| Zheng N <sup>50</sup>     | 2016             | 2000             | 2008           | China          | Asia          | Retrospective | 96          | 60                                       |
| Peng ZW <sup>51</sup>     | 2012             | 2002             | 2007           | China          | Asia          | Retrospective | 201         | –                                        |
| Chen JS <sup>52</sup>     | 2012             | 2006             | 2008           | China          | Asia          | Retrospective | 88          | –                                        |
| Cheng YQ <sup>53</sup>    | 2019             | 2002             | 2012           | China          | Asia          | Retrospective | 538         | –                                        |
| Tang QH <sup>54</sup>     | 2013             | 2006             | 2008           | China          | Asia          | Retrospective | 186         | 10.7                                     |
| Li J <sup>55</sup>        | 2018             | 2001             | 2014           | China          | Asia          | Retrospective | 169         | –                                        |
| Ye JZ <sup>56</sup>       | 2014             | 2007             | 2009           | China          | Asia          | Retrospective | 90          | –                                        |
| Zhang YF <sup>57</sup>    | 2016             | 2005             | 2012           | China          | Asia          | Retrospective | 113         | 15.3                                     |
| Wang K <sup>58</sup>      | 2016             | 2002             | 2014           | China          | Asia          | Retrospective | 745         | –                                        |
| Zhang F <sup>59</sup>     | 2020             | 2005             | 2012           | China          | Asia          | Retrospective | 1517        | –                                        |
| Zhang XP <sup>60</sup>    | 2019             | 2004             | 2014           | China          | Asia          | Prospective   | 432         | –                                        |
| Zhang YF <sup>61</sup>    | 2015             | 2006             | 2013           | China          | Asia          | Retrospective | 28          | 11                                       |
| Xu JF <sup>62</sup>       | 2015             | 2008             | 2012           | China          | Asia          | Retrospective | 56          | –                                        |
| Li J <sup>63</sup>        | 2016             | 2009             | 2013           | China          | Asia          | Retrospective | 24          | 23                                       |
| Guo WX <sup>64</sup>      | 2017             | 2009             | 2013           | China          | Asia          | Retrospective | 45          | 3                                        |
| Li N <sup>65</sup>        | 2016             | 2010             | 2013           | China          | Asia          | Prospective   | 50          | 8.4                                      |
| Chen ZH <sup>66</sup>     | 2019             | 2012             | 2016           | China          | Asia          | Retrospective | 105         | –                                        |
| Wei X <sup>67</sup>       | 2019             | 2016             | 2017           | China          | Asia          | Retrospective | 82          | 10.8                                     |
| Matono R <sup>68</sup>    | 2012             | 1985             | 2005           | Japan          | Asia          | Retrospective | 29          | –                                        |
| Kokudo T <sup>69</sup>    | 2017             | 2000             | 2007           | Japan          | Asia          | Retrospective | 651         | –                                        |
| Hatano E <sup>70</sup>    | 2018             | 2000             | 2010           | Japan          | Asia          | Retrospective | 266         | –                                        |
| Lee JM <sup>71</sup>      | 2016             | 2000             | 2011           | Korea          | Asia          | Retrospective | 40          | –                                        |
| Lee D <sup>72</sup>       | 2018             | 2005             | 2008           | Korea          | Asia          | Retrospective | 43          | 22                                       |
| Yu JI <sup>73</sup>       | 2018             | 2010             | 2014           | Korea          | Asia          | Retrospective | 31          | 24.6                                     |
| Lei HJ <sup>74</sup>      | 2006             | 1991             | 1999           | Taiwan         | Asia          | Prospective   | 76          | –                                        |
| Liu PH <sup>75</sup>      | 2014             | 2002             | 2012           | Taiwan         | Asia          | Retrospective | 247         | 24                                       |
| Chok KS <sup>76</sup>     | 2014             | 1989             | 2010           | Hong Kong      | Asia          | Prospective   | 88          | –                                        |
| Le Treut YP <sup>77</sup> | 2006             | 1988             | 2004           | France         | Europe        | Retrospective | 26          | –                                        |
| Pesi B <sup>78</sup>      | 2015             | 1987             | 2009           | Italy          | Europe        | Retrospective | 62          | 82.8                                     |
| Roayaie S <sup>79</sup>   | 2013             | 1992             | 2010           | USA            | North America | Prospective   | 165         | 11.9                                     |
| Lim C <sup>80</sup>       | 2015             | 1995             | 2012           | France         | Europe        | Retrospective | 45          | 17.5                                     |
| Cortese S <sup>81</sup>   | 2020             | 2007             | 2015           | Spain          | Europe        | Retrospective | 12          | 81.3                                     |
| Torzilli G <sup>82</sup>  | 2013             | 1990             | 2009           | Multicenter    | Multicenter   | Retrospective | 297         | –                                        |
| Ye J <sup>83</sup>        | 2016             | 2009             | 2011           | China          | Asia          | Retrospective | 160         | –                                        |

**Table S3** Patient and tumor characteristics of included studies

| Author                    | Publication year | Overall number of pts with PVTT | Overall number of pts with HVTT | Mean age - years (SD) | Male (%) | Cirrhosis (%) | Mean platelet (SD) (x 10 <sup>9</sup> /L) | Size - cm (SD) | Number of nodules (SD) | Single tumour (%) | Multiple nodules (%) | Mean MELD (SD) | Mean AFP (SD)   | Poorly differentiated histology (%) | Follow-up duration, median/ mean (months) |
|---------------------------|------------------|---------------------------------|---------------------------------|-----------------------|----------|---------------|-------------------------------------------|----------------|------------------------|-------------------|----------------------|----------------|-----------------|-------------------------------------|-------------------------------------------|
| Chen XP <sup>45</sup>     | 2006             | 438                             | –                               | –                     | 87       | –             | –                                         | –              | –                      | 83                | 17                   | –              | –               | –                                   | –                                         |
| Peng BG <sup>46</sup>     | 2009             | 53                              | –                               | 50.2 (7.5)            | 94       | 70            | –                                         | 8.39 (2.29)    | –                      | –                 | –                    | –              | –               | –                                   | 33.6                                      |
| Fan J <sup>47</sup>       | 2005             | 24                              | –                               | –                     | 83       | –             | –                                         | –              | –                      | 58                | 42                   | –              | –               | –                                   | –                                         |
| Shi J <sup>48</sup>       | 2010             | 406                             | –                               | 47.3 (10)             | 89       | 79            | 146.5 (72.8)                              | –              | –                      | –                 | –                    | –              | 710.2 (417.9)   | –                                   | 6.4                                       |
| Shi J <sup>16</sup>       | 2011             | 441                             | –                               | –                     | 90       | –             | –                                         | –              | –                      | 91                | 9                    | –              | –               | –                                   | 6.4                                       |
| Liang LJ <sup>49</sup>    | 2008             | 53                              | –                               | 46.41 (10.21)         | 91       | 77            | –                                         | –              | –                      | 62                | 38                   | –              | –               | –                                   | 10.2                                      |
| Zheng N <sup>50</sup>     | 2016             | 96                              | –                               | 51.9 (48.2)           | 78       | 100           | –                                         | 7.9 (2.2)      | 2.4 (1.4)              | –                 | –                    | 7.1 (1.4)      | 1120.6 (3930.7) | –                                   | 60                                        |
| Peng ZW <sup>51</sup>     | 2012             | 201                             | –                               | –                     | 93       | 88            | –                                         | –              | –                      | 47                | 53                   | –              | –               | –                                   | –                                         |
| Chen JS <sup>52</sup>     | 2012             | 88                              | –                               | 48.2 (11.4)           | 93       | 83            | 202.4 (78.4)                              | 10.1 (3.5)     | –                      | 51                | 49                   | –              | –               | –                                   | –                                         |
| Cheng YQ <sup>53</sup>    | 2019             | 538                             | –                               | –                     | 92       | 70            | –                                         | –              | –                      | 93                | 7                    | –              | –               | –                                   | –                                         |
| Tang QH <sup>54</sup>     | 2013             | 186                             | –                               | 48.4 (9.1)            | 89       | 80            | –                                         | 9.53 (3.43)    | –                      | 54                | 46                   | –              | –               | –                                   | 10.7                                      |
| Li J <sup>55</sup>        | 2018             | –                               | –                               | –                     | –        | –             | –                                         | –              | –                      | –                 | –                    | –              | –               | –                                   | –                                         |
| Ye JZ <sup>56</sup>       | 2014             | –                               | –                               | 49.3 (10.7)           | 90       | –             | –                                         | 6.9 (1.6)      | –                      | 57                | 43                   | –              | –               | –                                   | –                                         |
| Zhang YF <sup>57</sup>    | 2016             | 113                             | –                               | 49 (11.2)             | 88       | 42            | 209.1 (83.6)                              | 8.5 (4.1)      | –                      | 85                | 15                   | 4.6 (3.1)      | –               | –                                   | 15.3                                      |
| Wang K <sup>58</sup>      | 2016             | 745                             | –                               | –                     | 91       | 69            | –                                         | –              | –                      | 93                | 7                    | –              | –               | –                                   | –                                         |
| Zhang F <sup>59</sup>     | 2020             | 1517                            | –                               | –                     | –        | –             | –                                         | –              | –                      | –                 | –                    | –              | –               | –                                   | –                                         |
| Zhang XP <sup>60</sup>    | 2019             | 432                             | –                               | –                     | 91       | 70            | –                                         | –              | –                      | 87                | 13                   | 8.82 (3.94)    | –               | –                                   | –                                         |
| Zhang YF <sup>61</sup>    | 2015             | –                               | –                               | 47.4 (10.3)           | 96       | 96            | 208.6 (77.3)                              | 9.6 (3.4)      | –                      | 61                | 39                   | –              | –               | –                                   | 11                                        |
| Xu JF <sup>62</sup>       | 2015             | 56                              | –                               | –                     | 20       | 61            | –                                         | 5.6 (4.5)      | –                      | 34                | 66                   | –              | –               | –                                   | –                                         |
| Li J <sup>63</sup>        | 2016             | 24                              | –                               | 52.8 (6.9)            | 100      | 100           | 164.3 (48.6)                              | –              | –                      | –                 | –                    | –              | –               | 17                                  | 23                                        |
| Guo WX <sup>64</sup>      | 2017             | 45                              | –                               | 50.1 (9.2)            | 89       | 82            | –                                         | 9.4 (2.3)      | –                      | –                 | –                    | –              | –               | –                                   | 3                                         |
| Li N <sup>65</sup>        | 2016             | 50                              | –                               | –                     | 84       | 60            | –                                         | –              | –                      | 80                | 20                   | –              | –               | 10                                  | 8.4                                       |
| Chen ZH <sup>66</sup>     | 2019             | 37                              | 105                             | –                     | 90       | –             | –                                         | –              | –                      | 80                | 20                   | –              | –               | –                                   | –                                         |
| Wei X <sup>67</sup>       | 2019             | 82                              | –                               | 50.5 (10.1)           | 90       | 17            | –                                         | –              | –                      | 84                | 16                   | –              | –               | 90                                  | 10.8                                      |
| Matono R <sup>68</sup>    | 2012             | 29                              | –                               | –                     | 86       | –             | –                                         | –              | –                      | –                 | –                    | –              | –               | –                                   | –                                         |
| Kokudo T <sup>69</sup>    | 2017             | 420                             | 546                             | 64 (11)               | 83       | –             | 190 (86.9)                                | 8.78 (5.13)    | –                      | –                 | –                    | –              | –               | –                                   | –                                         |
| Hatano E <sup>70</sup>    | 2018             | –                               | –                               | –                     | –        | –             | –                                         | –              | –                      | –                 | –                    | –              | –               | –                                   | –                                         |
| Lee JM <sup>71</sup>      | 2016             | 40                              | –                               | 55 (12.9)             | 75       | 68            | –                                         | –              | –                      | –                 | –                    | 8.3 (3.0)      | 10728 (25073)   | –                                   | –                                         |
| Lee D <sup>72</sup>       | 2018             | 43                              | –                               | –                     | 84       | –             | –                                         | –              | –                      | 53                | 47                   | –              | –               | –                                   | 22                                        |
| Yu JI <sup>73</sup>       | 2018             | 31                              | –                               | –                     | 81       | 45            | –                                         | –              | –                      | 81                | 19                   | –              | –               | –                                   | 24.6                                      |
| Lei HJ <sup>74</sup>      | 2006             | –                               | –                               | –                     | –        | –             | –                                         | –              | –                      | –                 | –                    | –              | –               | –                                   | –                                         |
| Liu PH <sup>75</sup>      | 2014             | 247                             | –                               | 58 (14)               | 82       | 100           | –                                         | –              | –                      | 66                | 34                   | 7.9 (2.1)      | 13130 (46071)   | –                                   | 24                                        |
| Chok KS <sup>76</sup>     | 2014             | 88                              | –                               | –                     | 95       | –             | –                                         | –              | –                      | –                 | –                    | –              | –               | 32                                  | –                                         |
| Le Treut YP <sup>77</sup> | 2006             | –                               | –                               | –                     | 85       | –             | –                                         | –              | –                      | –                 | –                    | –              | –               | –                                   | –                                         |
| Pesi B <sup>78</sup>      | 2015             | 41                              | 11                              | –                     | –        | 90            | –                                         | –              | –                      | –                 | –                    | –              | –               | –                                   | 82.8                                      |
| Roayaie S <sup>79</sup>   | 2013             | –                               | –                               | 55.8 (11.8)           | 80       | –             | 214 (102)                                 | 0.9 (0.559)    | 1.4 (0.8)              | –                 | –                    | –              | 21840 (76548)   | 42                                  | 11.9                                      |
| Lim C <sup>80</sup>       | 2015             | 45                              | –                               | 57 (12)               | 73       | 16            | 276.5 (130.9)                             | 1.64 (0.483)   | 1.5 (1.1)              | –                 | –                    | –              | 500 (–)         | –                                   | 17.5                                      |
| Cortese S <sup>81</sup>   | 2020             | 11                              | 1                               | 59.8 (11.8)           | 83       | 92            | –                                         | –              | 1.5 (0.8)              | –                 | –                    | –              | 1349.6 (642.9)  | –                                   | 81.3                                      |
| Torzilli G <sup>82</sup>  | 2013             | –                               | –                               | –                     | 77       | 57            | –                                         | –              | –                      | –                 | –                    | –              | –               | –                                   | –                                         |
| Ye J <sup>83</sup>        | 2016             | 160                             | –                               | 52.17 (21.09)         | 76       | –             | 251.11 (73.56)                            | –              | –                      | –                 | –                    | –              | –               | –                                   | –                                         |

**Table S4** Quality assessment of included studies (NOS)

| Author                    | Publication year | Study start year | Study end year | Representativeness (0,1,2) | HCC as outcome of interest (0,1,2) | Sample size (0,1) | Comparability of study population (0,2) | Outcome assessment (0,1) | Statistical test (0,1) | Total Score (0-9) |
|---------------------------|------------------|------------------|----------------|----------------------------|------------------------------------|-------------------|-----------------------------------------|--------------------------|------------------------|-------------------|
| Chen XP <sup>45</sup>     | 2006             | 1990             | 2003           | 2                          | 2                                  | 1                 | 2                                       | 1                        | 1                      | 9                 |
| Peng BG <sup>46</sup>     | 2009             | 1996             | 2004           | 2                          | 2                                  | 1                 | 2                                       | 1                        | 1                      | 9                 |
| Fan J <sup>47</sup>       | 2005             | 1997             | 2004           | 2                          | 2                                  | 0                 | 2                                       | 1                        | 1                      | 8                 |
| Shi J <sup>48</sup>       | 2010             | 2001             | 2003           | 2                          | 2                                  | 1                 | 2                                       | 1                        | 1                      | 9                 |
| Shi J <sup>16</sup>       | 2011             | 2001             | 2004           | 2                          | 2                                  | 1                 | 2                                       | 1                        | 1                      | 9                 |
| Liang LJ <sup>49</sup>    | 2008             | 2001             | 2005           | 2                          | 2                                  | 1                 | 2                                       | 1                        | 1                      | 9                 |
| Zheng N <sup>50</sup>     | 2016             | 2000             | 2008           | 2                          | 2                                  | 1                 | 2                                       | 1                        | 1                      | 9                 |
| Peng ZW <sup>51</sup>     | 2012             | 2002             | 2007           | 2                          | 2                                  | 1                 | 2                                       | 1                        | 1                      | 9                 |
| Chen JS <sup>52</sup>     | 2012             | 2006             | 2008           | 2                          | 2                                  | 1                 | 2                                       | 1                        | 1                      | 9                 |
| Cheng YQ <sup>53</sup>    | 2019             | 2002             | 2012           | 2                          | 2                                  | 1                 | 2                                       | 1                        | 1                      | 9                 |
| Tang QH <sup>54</sup>     | 2013             | 2006             | 2008           | 2                          | 2                                  | 1                 | 2                                       | 1                        | 1                      | 9                 |
| Li J <sup>55</sup>        | 2018             | 2001             | 2014           | 2                          | 2                                  | 1                 | 2                                       | 1                        | 1                      | 9                 |
| Ye JZ <sup>56</sup>       | 2014             | 2007             | 2009           | 2                          | 2                                  | 1                 | 2                                       | 1                        | 1                      | 9                 |
| Zhang YF <sup>57</sup>    | 2016             | 2005             | 2012           | 2                          | 2                                  | 1                 | 2                                       | 1                        | 1                      | 9                 |
| Wang K <sup>58</sup>      | 2016             | 2002             | 2014           | 2                          | 2                                  | 1                 | 2                                       | 1                        | 1                      | 9                 |
| Zhang F <sup>59</sup>     | 2020             | 2005             | 2012           | 2                          | 2                                  | 1                 | 2                                       | 1                        | 1                      | 9                 |
| Zhang XP <sup>60</sup>    | 2019             | 2004             | 2014           | 2                          | 2                                  | 1                 | 2                                       | 1                        | 1                      | 9                 |
| Zhang YF <sup>61</sup>    | 2015             | 2006             | 2013           | 2                          | 2                                  | 0                 | 2                                       | 1                        | 1                      | 8                 |
| Xu JF <sup>62</sup>       | 2015             | 2008             | 2012           | 2                          | 2                                  | 1                 | 2                                       | 1                        | 1                      | 9                 |
| Li J <sup>63</sup>        | 2016             | 2009             | 2013           | 1                          | 2                                  | 0                 | 0                                       | 1                        | 1                      | 5                 |
| Guo WX <sup>64</sup>      | 2017             | 2009             | 2013           | 2                          | 2                                  | 0                 | 2                                       | 1                        | 1                      | 8                 |
| Li N <sup>65</sup>        | 2016             | 2010             | 2013           | 2                          | 2                                  | 1                 | 2                                       | 1                        | 1                      | 9                 |
| Chen ZH <sup>66</sup>     | 2019             | 2012             | 2016           | 2                          | 2                                  | 1                 | 2                                       | 1                        | 1                      | 9                 |
| Wei X <sup>67</sup>       | 2019             | 2016             | 2017           | 1                          | 2                                  | 1                 | 2                                       | 1                        | 1                      | 8                 |
| Matono R <sup>68</sup>    | 2012             | 1985             | 2005           | 1                          | 2                                  | 0                 | 0                                       | 1                        | 1                      | 5                 |
| Kokudo T <sup>69</sup>    | 2017             | 2000             | 2007           | 1                          | 2                                  | 1                 | 2                                       | 1                        | 1                      | 8                 |
| Hatano E <sup>70</sup>    | 2018             | 2000             | 2010           | 1                          | 2                                  | 1                 | 2                                       | 1                        | 1                      | 8                 |
| Lee JM <sup>71</sup>      | 2016             | 2000             | 2011           | 2                          | 2                                  | 0                 | 2                                       | 1                        | 1                      | 8                 |
| Lee D <sup>72</sup>       | 2018             | 2005             | 2008           | 2                          | 2                                  | 0                 | 2                                       | 1                        | 1                      | 8                 |
| Yu JI <sup>73</sup>       | 2018             | 2010             | 2014           | 2                          | 2                                  | 0                 | 2                                       | 1                        | 1                      | 8                 |
| Lei HJ <sup>74</sup>      | 2006             | 1991             | 1999           | 2                          | 2                                  | 1                 | 2                                       | 1                        | 1                      | 9                 |
| Liu PH <sup>75</sup>      | 2014             | 2002             | 2012           | 2                          | 2                                  | 1                 | 2                                       | 1                        | 1                      | 9                 |
| Chok KS <sup>76</sup>     | 2014             | 1989             | 2010           | 2                          | 2                                  | 1                 | 2                                       | 1                        | 1                      | 9                 |
| Le Treut YP <sup>77</sup> | 2006             | 1988             | 2004           | 2                          | 2                                  | 0                 | 2                                       | 1                        | 1                      | 8                 |
| Pesi B <sup>78</sup>      | 2015             | 1987             | 2009           | 2                          | 2                                  | 1                 | 2                                       | 1                        | 1                      | 9                 |
| Roayaie S <sup>79</sup>   | 2013             | 1992             | 2010           | 2                          | 2                                  | 1                 | 2                                       | 1                        | 1                      | 9                 |
| Lim C <sup>80</sup>       | 2015             | 1995             | 2012           | 2                          | 1                                  | 0                 | 2                                       | 1                        | 1                      | 8                 |
| Cortese S <sup>81</sup>   | 2020             | 2007             | 2015           | 2                          | 2                                  | 0                 | 2                                       | 1                        | 1                      | 8                 |
| Torzilli G <sup>82</sup>  | 2013             | 1990             | 2009           | 2                          | 2                                  | 1                 | 2                                       | 1                        | 1                      | 9                 |
| Ye J <sup>83</sup>        | 2016             | 2009             | 2011           | 2                          | 2                                  | 1                 | 2                                       | 1                        | 1                      | 9                 |

**Table S5** Studies\* that provided data for study, patient and tumour characteristics, by the presence of only portal vein tumor thrombosis (PVTT) or with PVTT and/or hepatic vein tumor thrombosis (HVTT).

|                                | Overall           |                                                                                                                      | PVTT Only         |                        |    |    | PVTT and/or HVTT |                   |                        |    |    |                   |    |    |    |    |    |    |
|--------------------------------|-------------------|----------------------------------------------------------------------------------------------------------------------|-------------------|------------------------|----|----|------------------|-------------------|------------------------|----|----|-------------------|----|----|----|----|----|----|
|                                | Number of Studies | Study reference number                                                                                               | Number of Studies | Study reference number |    |    |                  | Number of Studies | Study reference number |    |    |                   |    |    |    |    |    |    |
| <b>Study Characteristics</b>   |                   |                                                                                                                      |                   |                        |    |    |                  |                   |                        |    |    |                   |    |    |    |    |    |    |
| Median study year              | 40                | 16, 45-83                                                                                                            | 27                | 16                     | 46 | 47 | 48               | 49                | 50                     | 51 | 13 | 45                | 55 | 56 | 61 | 66 | 69 | 70 |
|                                |                   |                                                                                                                      |                   | 52                     | 53 | 54 | 57               | 58                | 59                     | 60 |    | 74                | 77 | 78 | 79 | 81 | 82 |    |
|                                |                   |                                                                                                                      |                   | 62                     | 63 | 64 | 65               | 67                | 68                     | 71 |    |                   |    |    |    |    |    |    |
|                                |                   |                                                                                                                      |                   | 72                     | 73 | 75 | 76               | 80                | 83                     |    |    |                   |    |    |    |    |    |    |
| Median follow up (months)      | 9                 | 16 46 54 61 65 67 72<br>73 75                                                                                        | 8                 | 16                     | 46 | 54 | 65               | 67                | 72                     | 73 | 1  | 61                |    |    |    |    |    |    |
|                                |                   |                                                                                                                      |                   |                        |    |    | 75               |                   |                        |    |    |                   |    |    |    |    |    |    |
| <b>Patient Characteristics</b> |                   |                                                                                                                      |                   |                        |    |    |                  |                   |                        |    |    |                   |    |    |    |    |    |    |
| Male (%)                       | 35                | 16 45 46 47 48 49 50<br>51 52 53 54 56 57 58<br>60 61 62 63 64 65 66<br>67 68 69 71 72 73 75<br>76 77 79 80 81 82 83 | 26                | 16                     | 46 | 47 | 48               | 49                | 50                     | 51 | 9  | 45                | 56 | 61 | 66 | 69 | 77 | 79 |
|                                |                   |                                                                                                                      |                   | 52                     | 53 | 54 | 57               | 58                | 60                     | 62 |    | 81 82             |    |    |    |    |    |    |
|                                |                   |                                                                                                                      |                   | 63                     | 64 | 65 | 67               | 68                | 71                     | 72 |    |                   |    |    |    |    |    |    |
|                                |                   |                                                                                                                      |                   | 73                     | 75 | 76 | 80               | 83                |                        |    |    |                   |    |    |    |    |    |    |
| Age (Years)                    | 31                | 16 46 48 49 50 51 52<br>54 56 57 60 61 63 64<br>65 66 67 68 69 71 72<br>73 75 76 77 78 79 80<br>81 82 83             | 22                | 16                     | 46 | 48 | 49               | 50                | 51                     | 52 | 9  | 56                | 61 | 66 | 69 | 77 | 78 | 79 |
|                                |                   |                                                                                                                      |                   | 54                     | 57 | 60 | 63               | 64                | 65                     | 67 |    | 81 82             |    |    |    |    |    |    |
|                                |                   |                                                                                                                      |                   | 68                     | 71 | 72 | 73               | 75                | 76                     | 80 |    |                   |    |    |    |    |    |    |
|                                |                   |                                                                                                                      |                   |                        |    |    | 83               |                   |                        |    |    |                   |    |    |    |    |    |    |
| Platelet (10 <sup>9</sup> /L)  | 12                | 48 51 52 57 61 63 69<br>72 79 80 82 83                                                                               | 8                 | 48                     | 51 | 52 | 57               | 63                | 72                     | 80 | 4  | 61 69 79 82       |    |    |    |    |    |    |
|                                |                   |                                                                                                                      |                   |                        |    |    | 83               |                   |                        |    |    |                   |    |    |    |    |    |    |
| MELD Score                     | 5                 | 50 57 60 71 75                                                                                                       | 5                 | 50                     | 57 | 60 | 71               | 75                |                        |    | 0  |                   |    |    |    |    |    |    |
| Cirrhosis (%)                  | 24                | 46 48 49 50 51 52 53<br>54 57 58 60 61 62 63<br>64 65 67 71 73 75 78<br>80 81 82                                     | 20                | 46                     | 48 | 49 | 50               | 51                | 52                     | 53 | 4  | 61 78 81 82       |    |    |    |    |    |    |
|                                |                   |                                                                                                                      |                   | 54                     | 57 | 58 | 60               | 62                | 63                     | 64 |    |                   |    |    |    |    |    |    |
|                                |                   |                                                                                                                      |                   | 65                     | 67 | 71 | 73               | 75                | 80                     |    |    |                   |    |    |    |    |    |    |
| Alcohol (%)                    | 6                 | 50 71 75 79 80 82                                                                                                    | 4                 | 50                     | 71 | 75 | 80               |                   |                        |    | 2  | 79 82             |    |    |    |    |    |    |
| HBV (%)                        | 29                | 16 45 46 48 49 50 52<br>53 54 56 57 58 61 62<br>63 65 66 67 68 69 71<br>72 73 75 76 78 79 80<br>82                   | 21                | 16                     | 46 | 48 | 49               | 50                | 52                     | 53 | 8  | 45                | 56 | 61 | 66 | 69 | 78 | 79 |
|                                |                   |                                                                                                                      |                   | 54                     | 57 | 58 | 62               | 63                | 65                     | 67 |    | 82                |    |    |    |    |    |    |
|                                |                   |                                                                                                                      |                   | 68                     | 71 | 72 | 73               | 75                | 76                     | 80 |    |                   |    |    |    |    |    |    |
| HCV (%)                        | 16                | 46 48 52 50 55 52 54<br>57 62 68 69 71 75 76<br>78 79 80 82                                                          | 12                | 46                     | 48 | 50 | 52               | 54                | 57                     | 62 | 4  | 69 78 79 82       |    |    |    |    |    |    |
|                                |                   |                                                                                                                      |                   | 68                     | 71 | 75 | 76               | 80                |                        |    |    |                   |    |    |    |    |    |    |
| Child-Pugh A (%)               | 28                | 16 46 47 48 49 50 51<br>52 53 54 56 58 60 61<br>62 63 65 66 67 69 71<br>72 73 75 76 77 78 79                         | 21                | 16                     | 46 | 47 | 48               | 49                | 50                     | 51 | 7  | 56                | 61 | 66 | 69 | 77 | 78 | 79 |
|                                |                   |                                                                                                                      |                   | 52                     | 53 | 54 | 58               | 60                | 62                     | 63 |    |                   |    |    |    |    |    |    |
|                                |                   |                                                                                                                      |                   | 65                     | 67 | 71 | 72               | 73                | 75                     | 76 |    |                   |    |    |    |    |    |    |
| Child-Pugh B (%)               | 27                | 16 46 47 48 49 50 51<br>52 53 54 56 58 60 61<br>62 63 65 66 67 69 71<br>72 73 75 76 77 78                            | 21                | 16                     | 46 | 47 | 48               | 49                | 50                     | 51 | 6  | 56 61 66 69 77 78 |    |    |    |    |    |    |
|                                |                   |                                                                                                                      |                   | 52                     | 53 | 54 | 58               | 60                | 62                     | 63 |    |                   |    |    |    |    |    |    |
|                                |                   |                                                                                                                      |                   | 65                     | 67 | 71 | 72               | 73                | 75                     | 76 |    |                   |    |    |    |    |    |    |

\*References are listed in the supplemental reference list.

**Table S6** Overall tumor and liver function characteristics.

| Characteristics                     | N (n) (n) <sup>b</sup> | Mean / Median / % (95% CI) |
|-------------------------------------|------------------------|----------------------------|
| Tumor number                        | 5 (540)                | 1.58 (1.14 – 2.01)         |
| Tumor size (cm)                     | 14 (1,747)             | 7.43 (5.44 – 9.42)         |
| Poorly differentiated histology (%) | 5 (409)                | 36.99 (13.08 – 69.61)      |
| Lymphatic invasion                  | 3 (803)                | 11.97 (8.48 – 16.65)       |
| Alpha-fetoprotein (ng/mL)           | 11 (1,336)             | 892.91 (496.50 – 1289.32)  |
| Child-Pugh A (%)                    | 28 (5,051)             | 96.21 (93.23 – 97.91)      |
| Child-Pugh B (%)                    | 27 (4,886)             | 4.25 (2.43 – 7.34)         |

<sup>a</sup>, All  $I^2 > 87.3$ , all P value for available  $I^2$  were  $< 0.05$ ; <sup>b</sup>, N, number of studies; n, number of patients

**Table S7A** Studies\* that provided data for overall survival (A) and recurrence free survival (B) after liver resection in patients with hepatocellular carcinoma with only portal vein tumor thrombosis (PVTT) or with PVTT and/or hepatic vein tumor thrombosis.

| Region                          | Number of Studies | Reference numbers of studies that provided data for 1-year (%)                                        | Number of Studies | Reference numbers of studies that provided data for 3-year (%)                         | Number of Studies | Reference numbers of studies that provided data for 5-year (%) |
|---------------------------------|-------------------|-------------------------------------------------------------------------------------------------------|-------------------|----------------------------------------------------------------------------------------|-------------------|----------------------------------------------------------------|
| <b>Overall Survival</b>         |                   |                                                                                                       |                   |                                                                                        |                   |                                                                |
| Overall                         | 30                | 16 45 46 47 48 49 50<br>51 52 54 55 56 57 59<br>61 62 64 65 66 67 68<br>69 72 73 75 77 78 80<br>81 82 | 26                | 16 45 46 47 48 49 50<br>51 52 54 55 56 57 59<br>61 65 66 68 69 72 75<br>77 78 80 81 82 | 19                | 45 46 50 51 54 55 57<br>59 68 69 70 74 75 77<br>78 79 80 81 82 |
| <b>By Country/region</b>        |                   |                                                                                                       |                   |                                                                                        |                   |                                                                |
| China                           | 20                | 16 45 46 47 48 49 50<br>51 52 54 55 56 57 59<br>61 62 64 65 66 67                                     | 17                | 16 45 46 47 48 49 50<br>51 52 54 55 56 57 59<br>61 65 66                               | 8                 | 45 46 50 51 54 55 57<br>59                                     |
| Japan                           | 2                 | 68 69                                                                                                 | 2                 | 68 69                                                                                  | 3                 | 68 69 70                                                       |
| Korea                           | 2                 | 72 73                                                                                                 | 1                 | 72                                                                                     | 0                 | --                                                             |
| Taiwan                          | 1                 | 75                                                                                                    | 1                 | 75                                                                                     | 2                 | 74 75                                                          |
| France                          | 2                 | 77 80                                                                                                 | 2                 | 77 80                                                                                  | 2                 | 77 80                                                          |
| Italy                           | 1                 | 78                                                                                                    | 1                 | 78                                                                                     | 1                 | 78                                                             |
| Spain                           | 1                 | 81                                                                                                    | 1                 | 81                                                                                     | 1                 | 81                                                             |
| United States                   | 0                 | --                                                                                                    | 0                 | --                                                                                     | 1                 | 79                                                             |
| <b>Recurrence-Free Survival</b> |                   |                                                                                                       |                   |                                                                                        |                   |                                                                |
| Overall                         | 15                | 16 48 49 51 54 57 59<br>66 67 72 73 78 80 81<br>82                                                    | 13                | 16 48 49 51 54 57 59<br>66 72 78 80 81 82                                              | 6                 | 51 59 78 80 81 82                                              |
| <b>By Country</b>               |                   |                                                                                                       |                   |                                                                                        |                   |                                                                |
| China                           | 9                 | 16 48 49 51 54 57 59<br>66 67                                                                         | 8                 | 16 48 49 51 54 57 59<br>66                                                             | 2                 | 51 59                                                          |
| Korea                           | 2                 | 72 73                                                                                                 | 1                 | 72                                                                                     | 0                 | --                                                             |
| France                          | 1                 | 80                                                                                                    | 1                 | 80                                                                                     | 1                 | 80                                                             |
| Italy                           | 1                 | 78                                                                                                    | 1                 | 78                                                                                     | 1                 | 78                                                             |
| Spain                           | 1                 | 81                                                                                                    | 1                 | 81                                                                                     | 1                 | 81                                                             |

\*References are listed in the supplemental reference list.

**Table S7B** Studies\* that provided data for overall survival (A) and recurrence free survival (B) after liver resection in patients with hepatocellular carcinoma and only portal vein tumor thrombosis (not inclusive of patients with hepatic vein tumor thrombus) .

| Region                          | Number of Studies | Reference numbers of studies that provided data for 1-year (%)    | Number of Studies | Reference numbers of studies that provided data for 3-year (%) | Number of Studies | Reference numbers of studies that provided data for 5-year (%) |
|---------------------------------|-------------------|-------------------------------------------------------------------|-------------------|----------------------------------------------------------------|-------------------|----------------------------------------------------------------|
| <b>Overall Survival</b>         |                   |                                                                   |                   |                                                                |                   |                                                                |
| Overall                         | 20                | 16 46 47 48 49 50 51<br>52 54 57 59 62 64 65<br>67 68 72 73 75 80 | 16                | 16 46 47 48 49 50 51<br>52 54 57 59 65 68 72<br>75 80          | 9                 | 46 50 51 54 57 59 68<br>75 80                                  |
| <b>By Country/region</b>        |                   |                                                                   |                   |                                                                |                   |                                                                |
| China                           | 15                | 16 46 47 48 49 50 51<br>52 54 57 59 62 64 65<br>67                | 12                | 16 46 47 48 49 50 51<br>52 54 57 59 65                         | 6                 | 46 50 51 54 57 59                                              |
| Japan                           | 1                 | 68                                                                | 1                 | 68                                                             | 1                 | 68                                                             |
| Korea                           | 2                 | 72 73                                                             | 1                 | 72                                                             | 0                 | --                                                             |
| Taiwan                          | 1                 | 75                                                                | 1                 | 75                                                             | 1                 | 75                                                             |
| France                          | 1                 | 80                                                                | 1                 | 80                                                             | 1                 | 80                                                             |
| <b>Recurrence-Free Survival</b> |                   |                                                                   |                   |                                                                |                   |                                                                |
| Overall                         | 11                | 16 48 49 51 54 57 59<br>67 72 73 80                               | 9                 | 16 48 49 51 54 57 59<br>72 80                                  | 3                 | 51 59 80                                                       |
| <b>By Country</b>               |                   |                                                                   |                   |                                                                |                   |                                                                |
| China                           | 8                 | 16 48 49 51 54 57 59<br>67                                        | 7                 | 16 48 49 51 54 57 59                                           | 2                 | 51 59                                                          |
| Korea                           | 2                 | 72 73                                                             | 1                 | 72                                                             | 0                 | --                                                             |
| France                          | 1                 | 80                                                                | 1                 | 80                                                             | 1                 | 80                                                             |

\*References are listed in the supplemental reference list.

**Table S7C** Studies\* that provided data for overall survival (A) and recurrence free survival (B) after liver resection in patients with hepatocellular carcinoma with hepatocellular carcinoma with portal vein tumor thrombosis and/or hepatic vein tumor thrombosis.

| Region                          | Number of Studies | Reference numbers of studies that provided data for 1-year (%) | Number of Studies | Reference numbers of studies that provided data for 3-year (%) | Number of Studies | Reference numbers of studies that provided data for 5-year (%) |
|---------------------------------|-------------------|----------------------------------------------------------------|-------------------|----------------------------------------------------------------|-------------------|----------------------------------------------------------------|
| <b>Overall Survival</b>         |                   |                                                                |                   |                                                                |                   |                                                                |
| Overall                         | 10                | 45 55 56 61 66 69 77<br>78 81 82                               | 10                | 45 55 56 61 66 69 77<br>78 81 82                               | 10                | 45 55 69 70 74 77 78<br>79 81 82                               |
| <b>By Country</b>               |                   |                                                                |                   |                                                                |                   |                                                                |
| China                           | 5                 | 45 55 56 61 66                                                 | 5                 | 45 55 56 61 66                                                 | 2                 |                                                                |
| Japan                           | 1                 | 69                                                             | 1                 | 69                                                             | 1                 | 69                                                             |
| Taiwan                          | 0                 | --                                                             | 0                 | --                                                             | 1                 | 74                                                             |
| France                          | 1                 | 77                                                             | 1                 | 77                                                             | 1                 | 77                                                             |
| Italy                           | 1                 | 78                                                             | 1                 | 78                                                             | 1                 | 78                                                             |
| Spain                           | 1                 | 81                                                             | 1                 | 81                                                             | 1                 | 81                                                             |
| United States                   | 0                 | --                                                             | 0                 | --                                                             | 1                 | 79                                                             |
| <b>Recurrence-Free Survival</b> |                   |                                                                |                   |                                                                |                   |                                                                |
| Overall                         | 4                 | 66 78 81 82                                                    | 4                 | 66 78 81 82                                                    | 3                 | 78 81 82                                                       |
| <b>By Country</b>               |                   |                                                                |                   |                                                                |                   |                                                                |
| China                           | 1                 | 66                                                             | 1                 | 66                                                             | 0                 | --                                                             |
| Italy                           | 1                 | 78                                                             | 1                 | 78                                                             | 1                 | 78                                                             |
| Spain                           | 1                 | 81                                                             | 1                 | 81                                                             | 1                 | 81                                                             |

\*References are listed in the supplemental reference list.



**Table S8** Studies that provided data for overall survival (A) and recurrence free survival (B) after liver resection in patients with hepatocellular carcinoma by presence of and sub-classification of portal vein tumor thrombosis.

| Sub-classification                                 | Number of Studies | Reference numbers of studies that provided data for 1-year (%) | Number of Studies | Reference numbers of studies that provided data for 3-year (%) | Number of Studies | Reference numbers of studies that provided data for 5-year (%) | Number of Studies | Reference numbers of studies that provided data for Median Survival |
|----------------------------------------------------|-------------------|----------------------------------------------------------------|-------------------|----------------------------------------------------------------|-------------------|----------------------------------------------------------------|-------------------|---------------------------------------------------------------------|
| <b>Overall Survival</b>                            |                   |                                                                |                   |                                                                |                   |                                                                |                   |                                                                     |
| Segmental & Second-Order Branch                    | 3                 | 48 78 83                                                       | 3                 | 48 78 83                                                       | 1                 | 78                                                             | 3                 | 48 58 83                                                            |
| First-Order Branch                                 | 4                 | 48 67 78 83                                                    | 3                 | 48 78 83                                                       | 1                 | 78                                                             | 3                 | 48 58 83                                                            |
| Main Trunk & Superior Mesenteric Vein              | 3                 | 48 65 67                                                       | 2                 | 48 65                                                          | 1                 | 65                                                             | 2                 | 48 58                                                               |
| <b>Recurrence-Free Survival</b>                    |                   |                                                                |                   |                                                                |                   |                                                                |                   |                                                                     |
| Segmental & Second-Order Branch                    | 1                 | 48                                                             | 1                 | 48                                                             | 0                 | –                                                              | 0                 | –                                                                   |
| First-Order Branch                                 | 2                 | 48                                                             | 1                 | 48                                                             | 0                 | –                                                              | 0                 | –                                                                   |
| Main Trunk & Superior Mesenteric Vein <sup>c</sup> | 2                 | 48 67                                                          | 1                 | 48                                                             | 0                 | –                                                              | 0                 | –                                                                   |

\*References are listed in the supplemental reference list.

**Table S9** Meta-regression of variables associated with 5-year overall survival after surgical resection

| Characteristics                         | N (n) <sup>a</sup> | Coefficient | 95% CI           | P      |
|-----------------------------------------|--------------------|-------------|------------------|--------|
| Age, per year                           | 15 (2,242)         | 0.0213      | -0.0591 – 0.1016 | 0.6037 |
| Tumor size, cm                          | 8 (1,335)          | 0.1056      | -0.0373 – 0.2486 | 0.1475 |
| Cirrhosis                               | 10 (1,237)         | 0.0027      | -0.0038 – 0.0092 | 0.4168 |
| Platelet (per 10 <sup>9</sup> increase) | 7 (1,531)          | 0.0045      | -0.0121 – 0.0211 | 0.5944 |
| Hepatitis B                             | 13 (2,441)         | -0.0011     | -0.0080 – 0.0059 | 0.7638 |
| Hepatitis C                             | 11 (1,869)         | 0.0027      | -0.0032 – 0.0085 | 0.3711 |

<sup>a</sup>, N, number of studies; n, number of patients

**Table S10** Systematic review of overall survival (OS) after liver resection in patients with hepatocellular carcinoma and macrovascular invasion, by tumor characteristics and characteristics of liver disease

| Variable                                | Study author          | Number of patients <sup>a</sup> | Median survival (months) (95% CI) | 1-year OS (%) | 3-year OS (%) | 5-year OS (%) |
|-----------------------------------------|-----------------------|---------------------------------|-----------------------------------|---------------|---------------|---------------|
| <b>Tumor characteristics</b>            |                       |                                 |                                   |               |               |               |
| AFP < 400                               | Chen JS <sup>52</sup> | 32                              | 10                                |               |               |               |
| AFP ≥ 400                               | Chen JS <sup>52</sup> | 56                              | 8                                 |               |               |               |
| <b>Characteristics of liver disease</b> |                       |                                 |                                   |               |               |               |
| Non-Cirrhosis                           | Chen JS <sup>52</sup> | 15                              | 9                                 |               |               |               |
|                                         | Pesi B <sup>78</sup>  | 6                               |                                   | 50            | 16.6          | 0             |
| Cirrhosis                               | Chen JS <sup>52</sup> | 73                              | 9                                 |               |               |               |
|                                         | Li J <sup>63</sup>    | 24                              | 30 (24.1 – 36.0)                  |               |               |               |
| Hepatitis B virus                       | Shi J <sup>48</sup>   | 354                             | 14.1                              |               |               |               |
|                                         | Chen JS <sup>52</sup> | 79                              | 9                                 |               |               |               |
|                                         | Li J <sup>63</sup>    | 24                              | 30 (24.1 – 36.0)                  |               |               |               |

<sup>a</sup>, Number of patients within the specified subgroup

**Table S11** Systematic review of overall survival (OS) and recurrence-free survival (RFS) after liver resection in patients with hepatocellular carcinoma and macrovascular invasion, by viral versus non-viral etiology.

| Study author             | Median OS (months) (95% CI) | 1-year OS (%) | 3-year OS (%) | 5-year OS (%) | 1-year RFS (%) | 3-year RFS (%) | 5-year RFS (%) |
|--------------------------|-----------------------------|---------------|---------------|---------------|----------------|----------------|----------------|
| <b>Viral</b>             |                             |               |               |               |                |                |                |
| Cheng YQ <sup>53</sup>   | 9.2                         | –             | –             | –             | –              | –              | –              |
| Pesi B <sup>78</sup>     | –                           | 57.10         | 34.80         | 21.70         | –              | –              | –              |
| Torzilli G <sup>82</sup> | –                           | 85            | 58            | 53            | 51             | 36             | 30             |
| <b>Non-Viral</b>         |                             |               |               |               |                |                |                |
| Cheng YQ <sup>53</sup>   | 16.0                        | –             | –             | –             | –              | –              | –              |
| Pesi B <sup>78</sup>     | –                           | 47.50         | 25.30         | 25.30         | –              | –              | –              |
| Torzilli G <sup>82</sup> | –                           | 77            | 53            | 0             | 52             | 0              | 0              |

**Table S12** Systematic review of overall survival (OS) and recurrence-free survival (RFS) after liver resection in patients with hepatocellular carcinoma and macrovascular invasion for isolated hepatic vein tumor thrombosis (HVTT).

| Study author                                      | Number of patients <sup>†</sup> | Median OS (months) (95% CI) | 1-year OS (%) | 3-year OS (%) | 5-year OS (%) | Median RFS (months) (95% CI) |
|---------------------------------------------------|---------------------------------|-----------------------------|---------------|---------------|---------------|------------------------------|
| <b>Peripheral hepatic vein tumor thrombosis</b>   |                                 |                             |               |               |               |                              |
| Chen ZH <sup>66</sup>                             | 21                              | –                           | –             | –             | –             | –                            |
| Kokudo T <sup>69</sup>                            | 305                             | 58.20                       | –             | –             | –             | 28.32                        |
| <b>Major hepatic vein tumor thrombosis</b>        |                                 |                             |               |               |               |                              |
| Chen ZH <sup>66</sup>                             | 10                              | –                           | –             | –             | –             | –                            |
| Kokudo T <sup>69</sup>                            | 170                             | 56.04                       | –             | –             | –             | 10.56                        |
| Pesi B <sup>78</sup>                              | 8                               | –                           | 75            | 45            | 31            | –                            |
| Cortese S <sup>81</sup>                           | 1                               | –                           | –             | –             | –             | –                            |
| <b>Tumor thrombosis of the inferior vena cava</b> |                                 |                             |               |               |               |                              |
| Chen ZH <sup>66</sup>                             | 74                              | –                           | 52.70         | 14.86         | –             | –                            |
| Kokudo T <sup>69</sup>                            | 71                              | 16.44                       | –             | –             | –             | 9.84                         |
| Pesi B <sup>78</sup>                              | 3                               | –                           | 50            | 0             | 0             | –                            |

<sup>†</sup>, Number of patients within the specified subgroup

**Table S13** Median overall survival (OS), overall survival, and recurrence-free survival (RFS) after liver resection in patients with hepatocellular carcinoma and macrovascular invasion by surgery type.

| Study author                          | Median OS (months) (95% CI) | 1-year OS (%) | 3-year OS (%) | 5-year OS (%) | 1-year RFS (%) | 3-year RFS (%) | 5-year RFS (%) |
|---------------------------------------|-----------------------------|---------------|---------------|---------------|----------------|----------------|----------------|
| <b>Open surgery (%)</b>               |                             |               |               |               |                |                |                |
| Zhang F <sup>59</sup>                 | 21                          | 67            | 30            | 10            | 57             | 21             | 4              |
| Chen ZH <sup>66</sup>                 | 19.4                        | 64.2          | 19.7          | –             | 51.9           | 22.6           | –              |
| Lim C <sup>80</sup>                   | 4.8                         | 30.8          | 20.5          | 15.4          | 32.5           | 11.6           | 11.6           |
| <b>Minimally invasive surgery (%)</b> |                             |               |               |               |                |                |                |
| Pesi B <sup>78</sup>                  | 12.9                        | 53.30         | 30.10         | 20.00         | 31.70          | 20.80          | 15.60          |

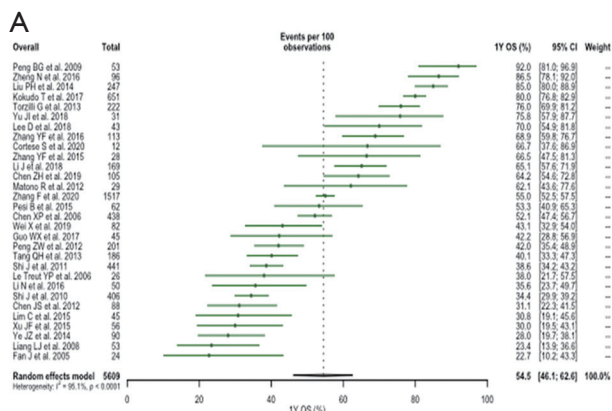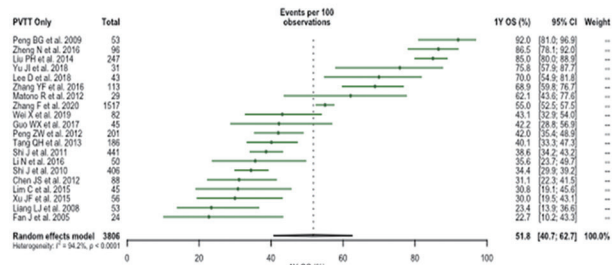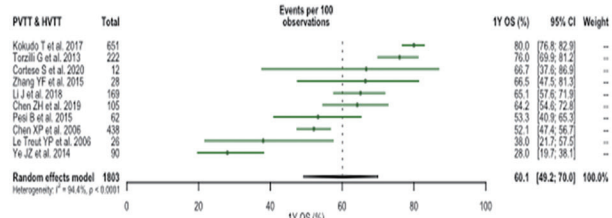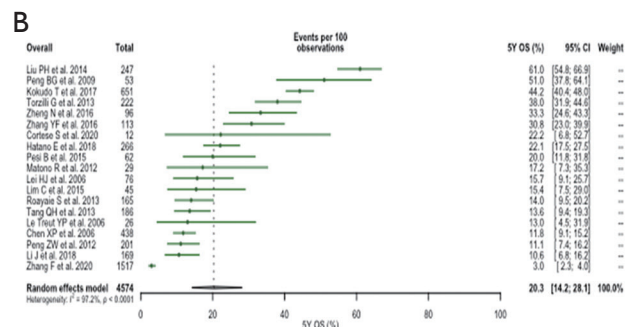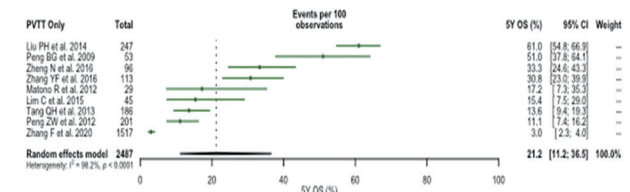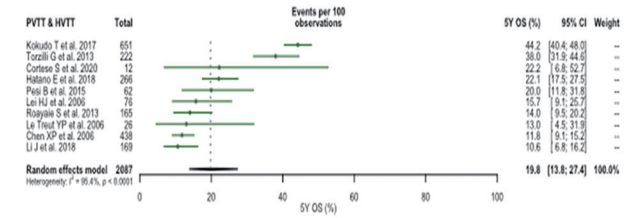

**Figure S1** Overall survival. (A) Forest plot for 1-year overall survival, overall and by the presence of only PVTT or with PVTT and/or HVTT. (B) Forest plot for 5-year overall survival overall and by the presence of only PVTT or with PVTT and/or HVTT. PVTT, portal vein tumor thrombosis; HVTT, hepatic vein tumor thrombosis.

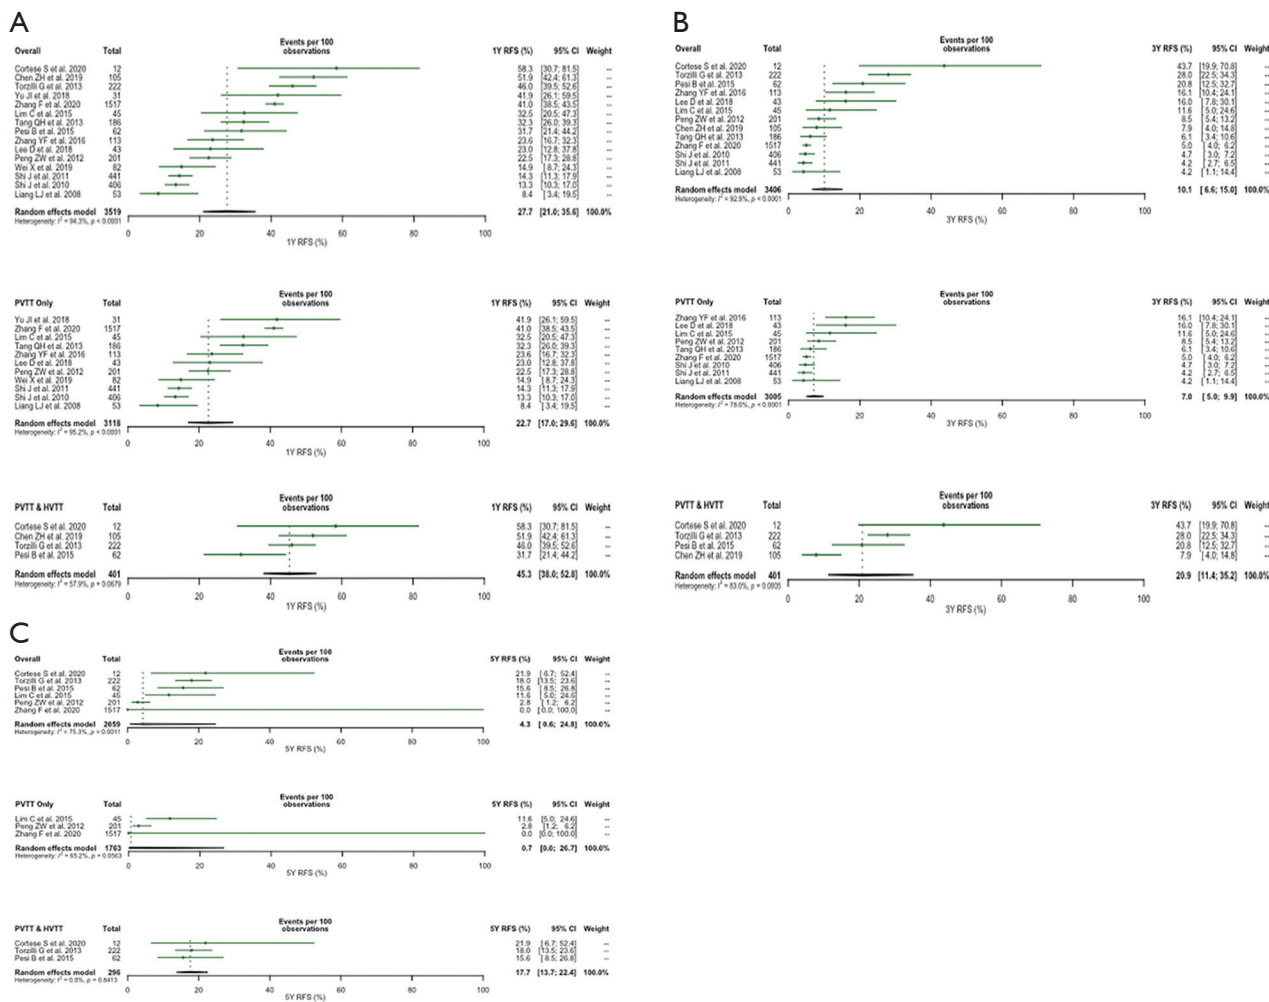

**Figure S2** Recurrence free survival. (A) Forest plot for 1-year recurrence free survival overall and by the presence of only PVTT or with PVTT and/or HVTT. (B) Forest plot for 3-year recurrence free survival overall and by the presence of only PVTT or with PVTT and/or HVTT. (C) Forest plot for 5-year recurrence-free survival overall and by the presence of only PVTT or with PVTT and/or HVTT. PVTT, portal vein tumor thrombosis; HVTT, hepatic vein tumor thrombosis.

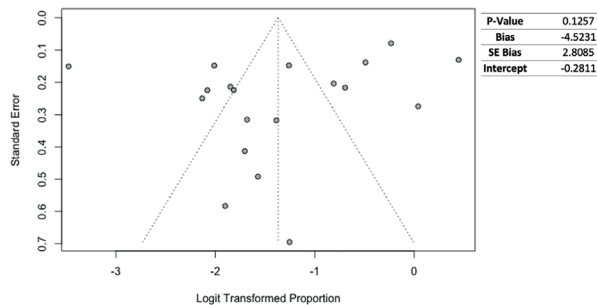

**Figure S3** Egger's test and funnel plot for 5-year overall survival.

## References

45. Chen XP, Qiu FZ, Wu ZD, et al. Effects of location and extension of portal vein tumor thrombus on long-term outcomes of surgical treatment for hepatocellular carcinoma. *Ann Surg Oncol* 2006;13:940-6.
46. Peng BG, He Q, Li JP, et al. Adjuvant transcatheter arterial chemoembolization improves efficacy of hepatectomy for patients with hepatocellular carcinoma and portal vein tumor thrombus. *Am J Surg* 2009;198:313-8.
47. Fan J, Zhou J, Wu ZQ, et al. Efficacy of different treatment strategies for hepatocellular carcinoma with portal vein tumor thrombosis. *World J Gastroenterol* 2005;11:1215-9.
48. Shi J, Lai EC, Li N, et al. Surgical treatment of hepatocellular carcinoma with portal vein tumor thrombus. *Ann Surg Oncol* 2010;17:2073-80.
49. Liang LJ, Hu WJ, Yin XY, et al. Adjuvant intraportal venous chemotherapy for patients with hepatocellular carcinoma and portal vein tumor thrombi following hepatectomy plus portal thrombectomy. *World J Surg* 2008;32:627-31.
50. Zheng N, Wei X, Zhang D, et al. Hepatic resection or transarterial chemoembolization for hepatocellular carcinoma with portal vein tumor thrombus. *Medicine (Baltimore)* 2016;95:e3959.
51. Peng ZW, Guo RP, Zhang YJ, et al. Hepatic resection versus transcatheter arterial chemoembolization for the treatment of hepatocellular carcinoma with portal vein tumor thrombus. *Cancer* 2012;118:4725-36.
52. Chen JS, Wang Q, Chen XL, et al. Clinicopathologic characteristics and surgical outcomes of hepatocellular carcinoma with portal vein tumor thrombosis. *J Surg Res* 2012;175:243-50.
53. Cheng YQ, Wang K, Zhang XP, et al. Thrombocytopenia: A prognostic factor for hepatocellular carcinoma patients with portal vein tumor thrombus after hepatectomy. *J Gastroenterol Hepatol* 2019;34:1214-21.
54. Tang QH, Li AJ, Yang GM, et al. Surgical resection versus conformal radiotherapy combined with TACE for resectable hepatocellular carcinoma with portal vein tumor thrombus: a comparative study. *World J Surg* 2013;37:1362-70.
55. Li J, Huang L, Yan J, et al. Liver resection for hepatocellular carcinoma: personal experiences in a series of 1330 consecutive cases in China. *ANZ J Surg* 2018;88:E713-7.
56. Ye JZ, Zhang YQ, Ye HH, et al. Appropriate treatment strategies improve survival of hepatocellular carcinoma patients with portal vein tumor thrombus. *World J Gastroenterol* 2014;20:17141-7.
57. Zhang YF, Le Y, Wei W, et al. Optimal surgical strategy for hepatocellular carcinoma with portal vein tumor thrombus: a propensity score analysis. *Oncotarget* 2016;7:38845-56.
58. Wang K, Guo WX, Chen MS, et al. Multimodality Treatment for Hepatocellular Carcinoma With Portal Vein Tumor Thrombus: A Large-Scale, Multicenter, Propensity Matching Score Analysis. *Medicine (Baltimore)* 2016;95:e3015.
59. Zhang F, Lu CD, Zhang XP, et al. The impact of portal vein tumor thrombus on long-term survival after liver resection for primary hepatic malignancy. *HPB (Oxford)* 2020;22:1025-33.
60. Zhang XP, Gao YZ, Chen ZH, et al. An Eastern Hepatobiliary Surgery Hospital/Portal Vein Tumor Thrombus Scoring System as an Aid to Decision Making on Hepatectomy for Hepatocellular Carcinoma Patients With Portal Vein Tumor Thrombus: A Multicenter Study. *Hepatology* 2019;69:2076-90.
61. Zhang YF, Wei W, Guo ZX, et al. Hepatic resection versus transcatheter arterial chemoembolization for the treatment of hepatocellular carcinoma with hepatic vein tumor thrombus. *Jpn J Clin Oncol* 2015;45:837-43.
62. Xu JF, Liu XY, Wang S, et al. Surgical treatment for hepatocellular carcinoma with portal vein tumor thrombus: a novel classification. *World J Surg Oncol* 2015;13:86.
63. Li J, Hou Y, Cai XB, et al. Sorafenib after resection improves the outcome of BCLC stage C hepatocellular carcinoma. *World J Gastroenterol* 2016;22:4034-40.
64. Guo WX, Guo L, Wang K, et al. Postoperative sorafenib prolongs survival of hepatocellular carcinoma patients with Portal vein tumor thrombus following hepatic resection. *Int J Clin Exp Med* 2017;10:1615-23.
65. Li N, Feng S, Xue J, et al. Hepatocellular carcinoma with main portal vein tumor thrombus: a comparative study comparing hepatectomy with or without neoadjuvant radiotherapy. *HPB (Oxford)* 2016;18:549-56.
66. Chen ZH, Zhang XP, Wang K, et al. Liver resection versus transcatheter arterial chemoembolization for the treatment of patients with hepatocellular carcinoma and hepatic vein or inferior vena cava tumor thrombus: A propensity score matching analysis. *Hepatol Res* 2019;49:441-52.
67. Wei X, Jiang Y, Zhang X, et al. Neoadjuvant Three-Dimensional Conformal Radiotherapy for Resectable Hepatocellular

Carcinoma With Portal Vein Tumor Thrombus: A Randomized, Open-Label, Multicenter Controlled Study. *J Clin Oncol* 2019;37:2141-51.

68. Matono R, Yoshiya S, Motomura T, et al. Factors linked to longterm survival of patients with hepatocellular carcinoma accompanied by tumor thrombus in the major portal vein after surgical resection. *HPB (Oxford)* 2012;14:247-53.
69. Kokudo T, Hasegawa K, Matsuyama Y, et al. Liver resection for hepatocellular carcinoma associated with hepatic vein invasion: A Japanese nationwide survey. *Hepatology* 2017;66:510-7.
70. Hatano E, Uemoto S, Yamaue H, et al. Significance of hepatic resection and adjuvant hepatic arterial infusion chemotherapy for hepatocellular carcinoma with portal vein tumor thrombus in the first branch of portal vein and the main portal trunk: a project study for hepatic surgery of the Japanese Society of Hepato-Biliary-Pancreatic Surgery. *J Hepatobiliary Pancreat Sci* 2018;25:395-402.
71. Lee JM, Jang BK, Lee YJ, et al. Survival outcomes of hepatic resection compared with transarterial chemoembolization or sorafenib for hepatocellular carcinoma with portal vein tumor thrombosis. *Clin Mol Hepatol* 2016;22:160-7.
72. Lee D, Lee HC, An J, et al. Comparison of surgical resection versus transarterial chemoembolization with additional radiation therapy in patients with hepatocellular carcinoma with portal vein invasion. *Clin Mol Hepatol* 2018;24:144-50.
73. Yu JI, Choi GS, Lim DH, et al. Treatment of Naïve HCC Combined with Segmental or Subsegmental Portal Vein Tumor Thrombosis: Liver Resection Versus TACE Followed by Radiotherapy. *Anticancer Res* 2018;38:4919-25.
74. Lei HJ, Chau GY, Lui WY, et al. Prognostic value and clinical relevance of the 6th Edition 2002 American Joint Committee on Cancer staging system in patients with resectable hepatocellular carcinoma. *J Am Coll Surg* 2006;203:426-35.
75. Lei HJ, Chau GY, Lui WY, et al. Prognostic value and clinical relevance of the 6th Edition 2002 American Joint Committee on Cancer staging system in patients with resectable hepatocellular carcinoma. *J Am Coll Surg* 2006;203:426-35.
76. Chok KS, Cheung TT, Chan SC, et al. Surgical outcomes in hepatocellular carcinoma patients with portal vein tumor thrombosis. *World J Surg* 2014;38:490-6.
77. Le Treut YP, Hardwigsen J, Ananian P, et al. Resection of hepatocellular carcinoma with tumor thrombus in the major vasculature. A European case-control series. *J Gastrointest Surg* 2006;10:855-62.
78. Pesi B, Ferrero A, Grazi GL, et al. Liver resection with thrombectomy as a treatment of hepatocellular carcinoma with major vascular invasion: results from a retrospective multicentric study. *Am J Surg* 2015;210:35-44.
79. Roayaie S, Jibara G, Taouli B, et al. Resection of hepatocellular carcinoma with macroscopic vascular invasion. *Ann Surg Oncol* 2013;20:3754-60.
80. Lim C, Compagnon P, Sebagh M, et al. Hepatectomy for hepatocellular carcinoma larger than 10 cm: preoperative risk stratification to prevent futile surgery. *HPB (Oxford)* 2015;17:611-23.
81. Cortese S, Morales J, Martín L, et al. Hepatic resection with thrombectomy in the treatment of hepatocellular carcinoma associated with macrovascular invasion. *Cir Esp (Engl Ed)* 2020;98:9-17.
82. Torzilli G, Belghiti J, Kokudo N, et al. A snapshot of the effective indications and results of surgery for hepatocellular carcinoma in tertiary referral centers: is it adherent to the EASL/AASLD recommendations?: an observational study of the HCC East-West study group. *Ann Surg* 2013;257:929-37.
83. Ye J, Ye H, Xie S, et al. Indications and treatment of hepatocellular carcinoma with portal vein tumor thrombus based on two classifications. *Int J Clin Exp Med* 2016;9:9021-32.
